# Supplementary material for: A directly negative interaction of miR-203 and ZEB2 modulates tumor stemness and chemotherapy resistance in nasopharyngeal carcinoma
Source: PubMed Central journal article supplement (PMC5341875; doi:10.18632/oncotarget.11691), 2016-08-30
Supplement: oncotarget-07-67288-s001.pdf [file oncotarget-07-67288-s001.pdf]

## A directly negative interaction of miR-203 and ZEB2 modulates tumor stemness and chemotherapy resistance in nasopharyngeal carcinoma

### SUPPLEMENTARY FIGURE AND TABLE

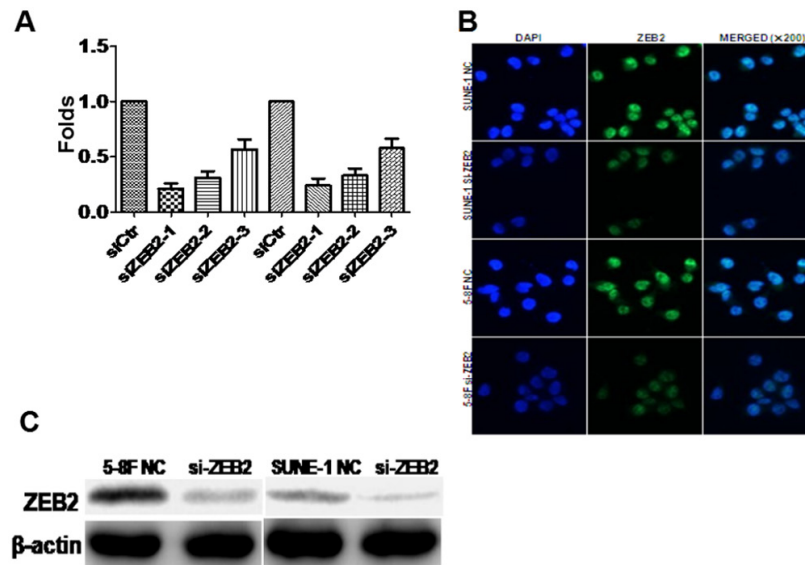

**Supplementary Figure S1: Knockdown efficiency of siZEB2s in NPC cells.** A. Real-time PCR demonstrated that siZEB2-1 exhibited best interfering efficiency in 5-8F (79%) and SUNE1 (76%) cells. B and C. Immunofluorescence and western blot confirmed significantly downregulated ZEB2 induced by siZEB2-1 in 5-8F and SUNE1 cells.

Supplementary Table S1: The sequences of siZEB2

| Si-ZEB2<br>sequence | sense                           | anti-sense                      |
|---------------------|---------------------------------|---------------------------------|
| siRNA-001           | 5'- GGACACAGGUUCUGAAACA dTdT-3' | 3'- dTdT CCUGUGUCCAAGACUUUGU-5' |
| siRNA-002           | 5'- CUGCAAGGCUGAAGAAAUU dTdT-3' | 3'- dTdT GACGUUCCGACUUCUUUAA-5' |
| siRNA-003           | 5'- CAAAUAAUCUGGACAACAA dTdT-3' | 3'- dTdT GUUUAUUAGACCUGUUGUU-5' |
